# Supplementary material for: Three-dimensional cavity-coupled metamaterials for plasmonic color and real-time colorimetric biosensors
Source: Royal Society of Chemistry journal article supplement (doi:10.1039/c9nr10343k), 2020-01-01
Supplement: c9nr10343k1.pdf [file c9nr10343k1.pdf]

## Supplementary Materials

### Three-Dimensional Cavity-Coupled Metamaterials for Plasmonic Color and Real-Time Colorimetric Biosensor

Jia Zhu<sup>a</sup>, Guanzhou Lin<sup>a</sup>, Yun Huang<sup>a</sup>, Kenan Zhang<sup>a,b</sup>, Meizhang Wu<sup>c</sup>, Wengang Wu<sup>\*a</sup> and Peimin Lu<sup>b</sup>

<sup>a</sup>National Key Laboratory of Science and Technology on Micro/Nano Fabrication, Institute of Microelectronics, Peking University, Beijing 100871, P.R. China.

<sup>b</sup>College of Physics and Information Engineering, Fuzhou University, Fuzhou, 350108, P.R. China.

<sup>c</sup>School of Automation, University of Science and Technology Beijing, Beijing 100083, P.R. China

\*Correspondence: wuwg@pku.edu.cn; Tel.: +86-10-62767553

Table S1<sup>#</sup>

| Concentration of glycerin | Refraction Index |
|---------------------------|------------------|
| 0%                        | 1.3311           |
| 10%                       | 1.3448           |
| 20%                       | 1.3575           |
| 30%                       | 1.3707           |
| 40%                       | 1.3841           |
| 50%                       | 1.3981           |
| 60%                       | 1.4128           |

Table S2

| Refraction Index | Dip positions (7 min) | Dip positions (9 min) |
|------------------|-----------------------|-----------------------|
| 1.3311           | 551.28 nm             | 634.38 nm             |
| 1.3448           | 552.07 nm             | 640.61 nm             |
| 1.3575           | 558.37 nm             | 656.16 nm             |
| 1.3707           | 562.37 nm             | 661.94 nm             |
| 1.3841           | 564.67 nm             | 668.11 nm             |
| 1.3981           | 567.82 nm             | 677.86 nm             |
| 1.4128           | 575.31 nm             | 691.80 nm             |

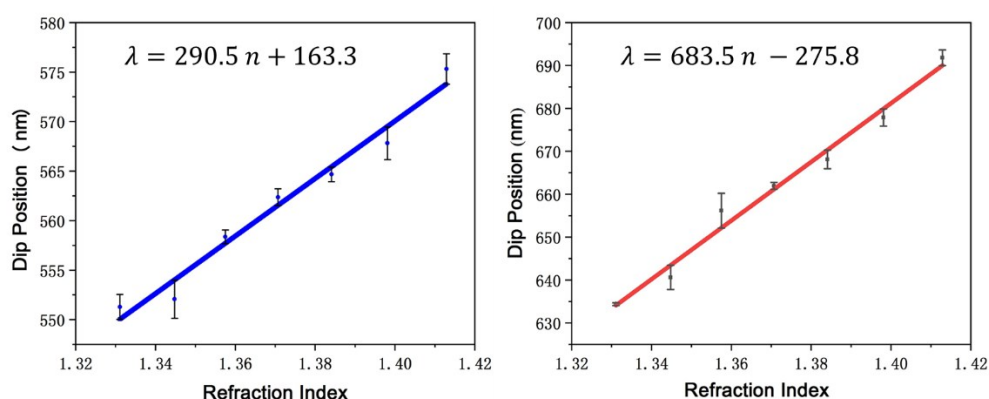

Figure S1. Dip position of the spectra from Fig.4b as a function of the refractive index.

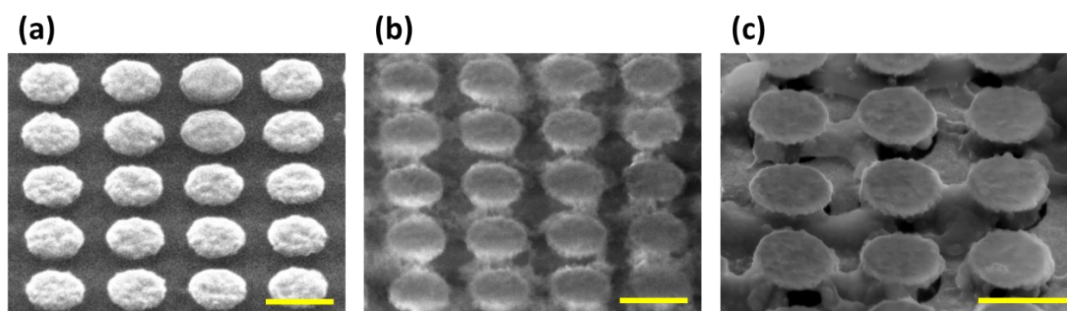

Figure S2. SEM images of the metamaterials before (a) and after (b) biotin and streptavidin immobilized. (c) 60° tilt view of the metamaterials to demonstrate the biomolecules filling in the cavities. The scale bar is 500 nm.

Table S3

| Time (min) | Dip positions (nm) | Dip shifts (nm)<br><i>Comparing to 0 min</i> |
|------------|--------------------|----------------------------------------------|
| 0          | 650.72             | 0                                            |
| 1          | 652.28             | 1.56                                         |
| 5          | 656.94             | 6.22                                         |
| 10         | 668.58             | 17.86                                        |
| 15         | 674.78             | 24.06                                        |
| 20         | 680.20             | 29.48                                        |
| 25         | 680.97             | 30.25                                        |
| 30         | 678.25             | 27.53                                        |
| 60         | 683.29             | 32.57                                        |

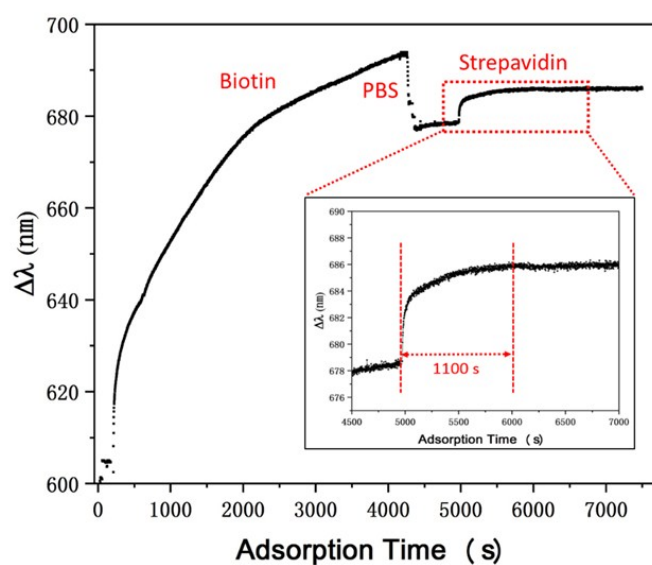

Figure S3. Adsorption dynamic curves of BAS binding to SPR chip. The SPR equipment is based on the Kretschmann configuration.

# Multidisciplinary Engineering, Refractive index of Glycerine-water solutions at 20°C (69°F).  
<http://edge.rit.edu/edge/P13051/public/Research%20Notes/refractive%20index%20glycerin%20water.pdf>
